# Supplementary material for: Sol–gel materials with trapped trinuclear class-II mixed-valence macrocyclic complexes that mimic their solution redox behaviour
Source: Royal Society of Chemistry journal article supplement (doi:10.1039/b710963f), 2008-01-01

## SOL-GEL MATERIALS WITH TRAPPED TRINUCLEAR CLASS-II MIXED-VALENCE MACROCYCLIC COMPLEXES THAT MIMIC THEIR SOLUTION REDOX BEHAVIOUR

Manuel G. Basallote,<sup>\*,a</sup> Fernando Bozoglian,<sup>b</sup> María J. Fernández-Trujillo<sup>a</sup> and  
Manuel Martínez.<sup>\*,b</sup>

<sup>a</sup> Departamento de Ciencia de los Materiales e Ingeniería Metalúrgica y Química  
Inorgánica, Universidad de Cádiz, Apartado 40, E-11510 Puerto Real, Cádiz, Spain.

<sup>b</sup> Departament de Química Inorgànica, Universitat de Barcelona, Martí i Franquès  
1-11, E-08028 Barcelona, Spain.

**FIGURE S1.**-Changes of the UV-Vis spectrum of a sample of the immobilized  
[ $\{L_{15S}Co^{III}(\mu-NC)\}Fe^{II}(CN)_5\}^-$  complex upon oxidation with a 0.1 M solution of  $S_2O_8^{2-}$   
at pH 3.

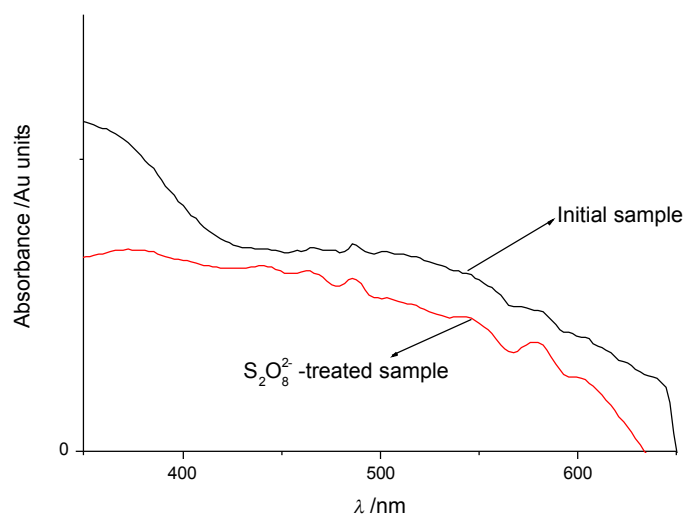

**FIGURE S2.**-IR spectra of the CN bond stretching region for the immobilized  $[\{L_{15Si}Co^{III}(\mu-NC)\}Fe^{II}(CN)_5]^-$  complex (bottom) and that obtained upon oxidation,  $[\{L_{15Si}Co^{III}(\mu-NC)\}Fe^{III}(CN)_5]^0$  (top).

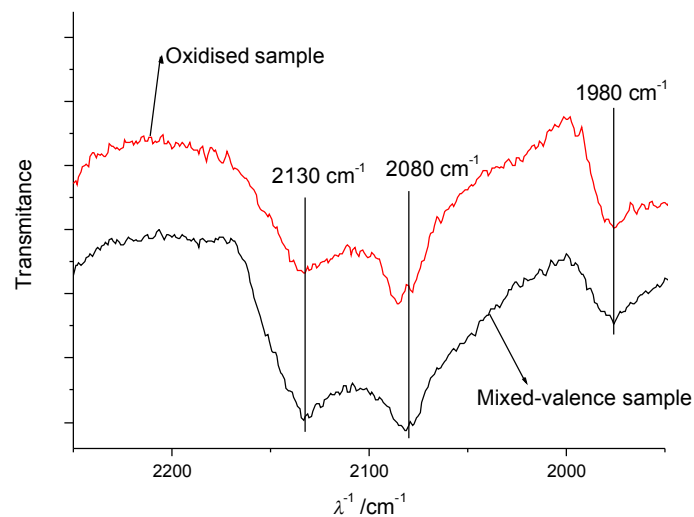

**FIGURE S3.**-Nitrogen adsorption-desorption isotherm for the sample containing trapped *trans*- $[\{L_{15}Co^{III}(\mu-N C)\}_2Fe^{II}(CN)_4]^{2+}$  complex.

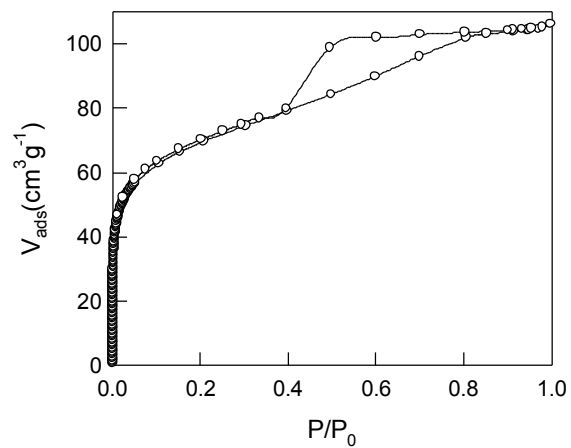

**FIGURE S4.-** *a)* BJH pore size distribution for a sample containing trapped *trans*- $[\{L_{15}Co^{III}(\mu\text{-NC})\}_2Fe^{II}(CN)_4]^{2+}$ . *b)* MP pore size distribution for the same sample.

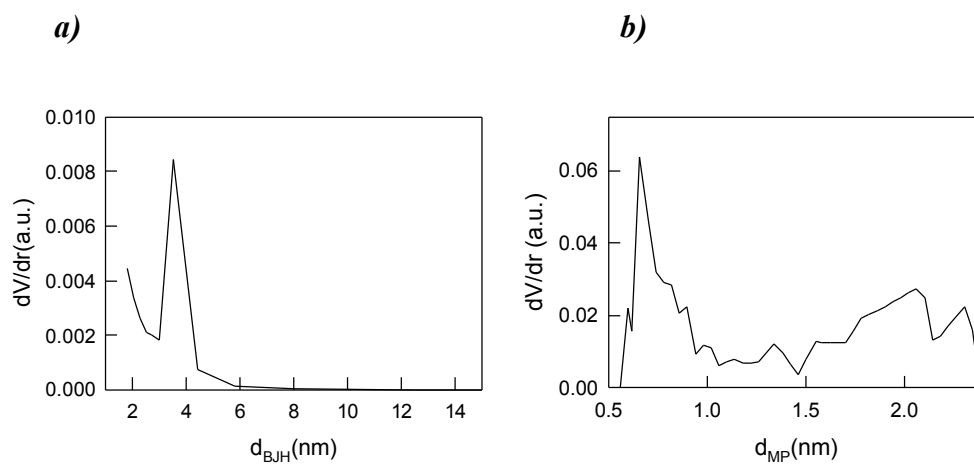

Supplement: b710963f.pdf [file b710963f.pdf]
